# Supplementary material for: Evaluating the electronic structure of formal LnIIions in LnII(C5H4SiMe3)31−using XANES spectroscopy and DFT calculations
Source: Royal Society of Chemistry journal article supplement (doi:10.1039/c7sc00825b), 2017-01-01
Supplement: c7sc00825b1.pdf [file c7sc00825b1.pdf]

## Supplemental Information

# *Evaluating the Electronic Structure of Formal Ln<sup>II</sup> Ions in Ln<sup>II</sup>(C<sub>5</sub>H<sub>4</sub>SiMe<sub>3</sub>)<sub>3</sub><sup>1-</sup> Using XANES Spectroscopy and DFT Calculations*

Megan E. Fieser,<sup>1,a</sup> Maryline G. Ferrier,<sup>2,a</sup> Jing Su,<sup>2,a</sup> Enrique Batista,<sup>2,\*</sup> Samantha K. Cary,<sup>2</sup> Jonathan W. Engle,<sup>2,3</sup> William J. Evans,<sup>1,\*</sup> Juan S. Lezama Pacheco,<sup>4</sup> Stosh A. Kozimor,<sup>2,\*</sup> Angela C. Olson,<sup>2</sup> Austin J. Ryan,<sup>1</sup> Benjamin W. Stein,<sup>2</sup> Gregory L. Wagner,<sup>2</sup> David H. Woen,<sup>1</sup> Tonya Vitova,<sup>5</sup> and Ping Yang<sup>2,\*</sup>

<sup>1</sup> *University of California, Irvine CA 92697*

<sup>2</sup> *Los Alamos National Laboratory, Los Alamos, NM 87545*

<sup>3</sup> *University of Wisconsin, Madison, Wisconsin 53711*

<sup>4</sup> *Stanford University, Palo Alto, CA 94305*

<sup>5</sup> *Karlsruhe Institute of Technology, Institute for Nuclear Waste Disposal, P.O. Box 3640, 76021 Karlsruhe, Germany*

<sup>a</sup> M. E. Fieser, M. G. Ferrier, J. Su contributed equally to this work.

\* To whom correspondence should be addressed, [stosh@lanl.gov](mailto:stosh@lanl.gov); [wevans@uci.edu](mailto:wevans@uci.edu); [erb@lanl.gov](mailto:erb@lanl.gov); [pyang@lanl.gov](mailto:pyang@lanl.gov)

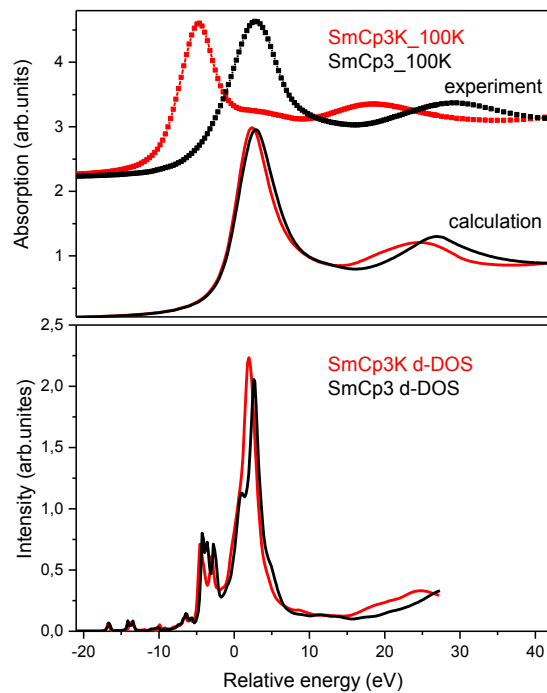

**Figure S1:** *Top*-The experimental and calculated (FEFF9.6 code) Sm L<sub>3</sub>-edge XANES spectra from Sm(C<sub>3</sub>H<sub>4</sub>SiMe<sub>3</sub>)<sub>3</sub><sup>x-</sup> (x = 0, 1). *Bottom*-The calculated d-DOS (bottom) from Sm(C<sub>3</sub>H<sub>4</sub>SiMe<sub>3</sub>)<sub>3</sub><sup>x-</sup> (x = 0, black trace; x = 1 red trace).

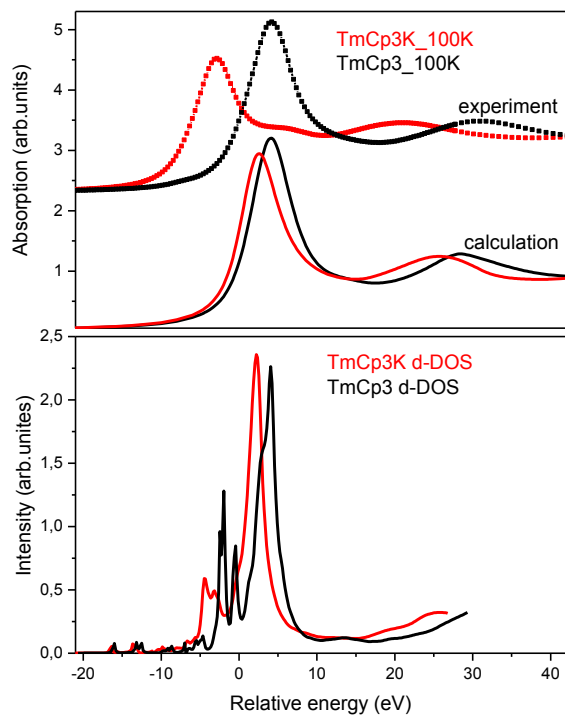

**Figure S2:** *Top*-The experimental and calculated (FEFF9.6 code) Tm L<sub>3</sub>-edge XANES spectra from Tm(C<sub>3</sub>H<sub>4</sub>SiMe<sub>3</sub>)<sub>3</sub><sup>x-</sup> (x = 0, 1). *Bottom*-The calculated d-DOS (bottom) from Tm(C<sub>3</sub>H<sub>4</sub>SiMe<sub>3</sub>)<sub>3</sub><sup>x-</sup> (x = 0, black trace; x = 1 red trace).

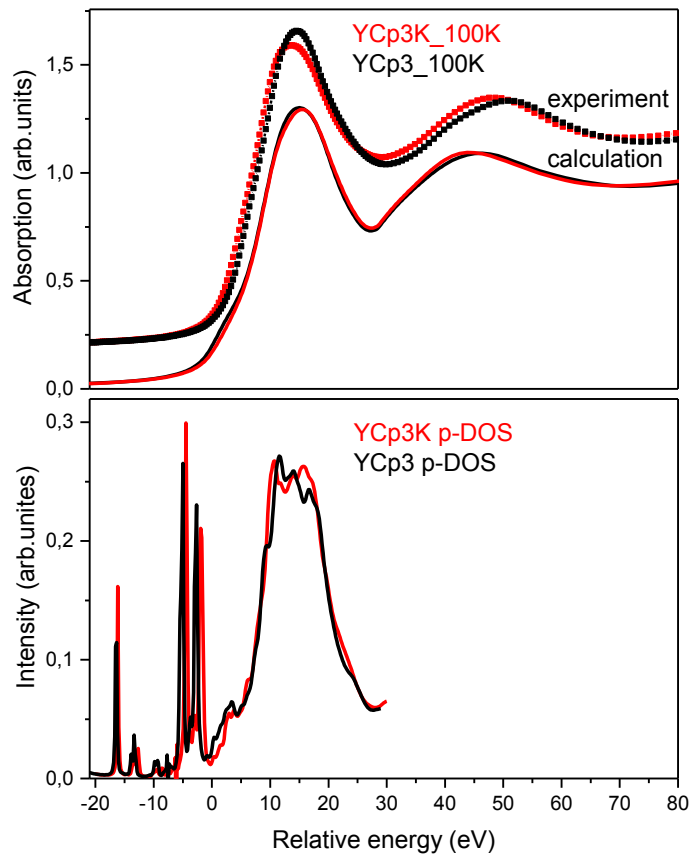

**Figure S3:** *Top*-The experimental and calculated (FEFF9.6 code) Y K-edge XANES spectra from  $Y(C_3H_4SiMe_3)_3^{x-}$  ( $x = 0, 1$ ). *Bottom*-The calculated d-DOS (bottom) from  $Y(C_3H_4SiMe_3)_3^{x-}$  ( $x = 0$ , black trace;  $x = 1$  red trace).

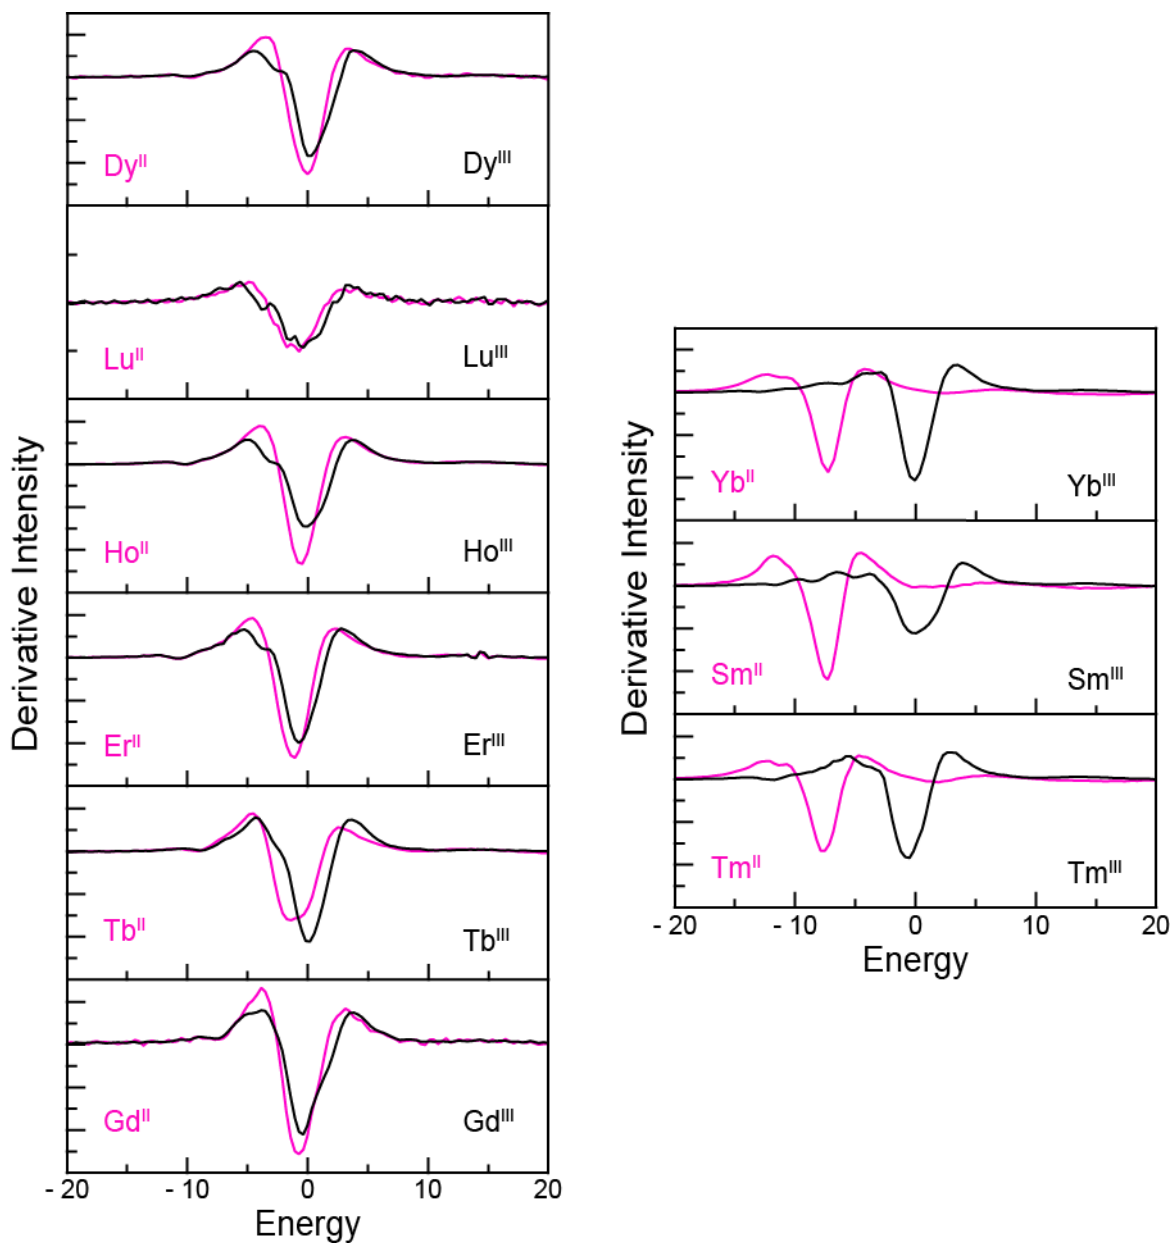

**Figure S4.** Second derivatives of the L<sub>3</sub>-edge XANES measurements obtained from Ln<sup>III</sup>(C<sub>5</sub>H<sub>4</sub>SiMe<sub>3</sub>)<sub>3</sub> (black traces) and [K(2.2.2-cryptand)][Ln<sup>II</sup>(C<sub>5</sub>H<sub>4</sub>SiMe<sub>3</sub>)<sub>3</sub>] (pink trace) for Ln = Dy, Lu, Ho, Er, Tb, Gd on the left and Yb, Sm, Tm on the right. Note, even though the Lu(C<sub>5</sub>H<sub>4</sub>SiMe<sub>3</sub>)<sub>3</sub><sup>x-</sup> (x = 0, 1) data is quite noisy, the second derivatives indicate that a pre-edge feature is well resolved from the rising edge.

Branching ratios were determined as described previously using a graphical approach based on the integration of the second-derivative of the data as defined by  $A_5/(A_5+A_4)$ . Here,  $A_5$  and  $A_4$  are the total areas under the second derivative of the  $L_3$  and  $L_2$ -edge peaks, respectively. The branching ratio performed on all lanthanide compounds gave similar results 0.62 – 0.66, see Table S1.

**Table S1.** Branching ratio for  $\text{Ln}^{\text{III}}(\text{C}_5\text{H}_4\text{SiMe}_3)$ ,  $[\text{K}(2.2.2\text{-cryptand})][\text{Ln}^{\text{II}}(\text{C}_5\text{H}_4\text{SiMe}_3)]$  for  $\text{Ln} = \text{Sm, Tb, Ho, Tm, Sm}^{\text{II}}(\text{C}_5\text{Me}_5)_2(\text{THF})_2$ ,  $\text{TmI}_2(\text{THF})_3$ , and  $\text{TmI}_3(\text{THF})_{3.5}$ .

| Compound                                                          | Branching Ratio | STDEV   | STDEV (%) |
|-------------------------------------------------------------------|-----------------|---------|-----------|
| $\text{Sm}^{\text{II}}(\text{C}_5\text{H}_4\text{SiMe}_3)_3^{1-}$ | 0.655           | 0.00073 | 0.11      |
| $\text{Sm}^{\text{III}}(\text{C}_5\text{H}_4\text{SiMe}_3)_3$     | 0.626           | 0.00017 | 0.03      |
| $\text{Sm}^{\text{II}}(\text{C}_5\text{Me}_5)_2\text{THF}_2$      | 0.647           | 0.00076 | 0.12      |
| $\text{Tb}^{\text{II}}(\text{C}_5\text{H}_4\text{SiMe}_3)_3^{1-}$ | 0.639           | 0.0008  | 0.13      |
| $\text{Tb}^{\text{III}}(\text{C}_5\text{H}_4\text{SiMe}_3)_3$     | 0.656           | 0.0004  | 0.06      |
| $\text{Ho}^{\text{II}}(\text{C}_5\text{H}_4\text{SiMe}_3)_3^{1-}$ | 0.611           | 0.0044  | 0.72      |
| $\text{Ho}^{\text{III}}(\text{C}_5\text{H}_4\text{SiMe}_3)_3$     | 0.639           | 0.003   | 0.05      |
| $\text{Tm}^{\text{II}}(\text{C}_5\text{H}_4\text{SiMe}_3)_3^{1-}$ | 0.647           | 0.00847 | 1.31      |
| $\text{Tm}^{\text{III}}(\text{C}_5\text{H}_4\text{SiMe}_3)_3$     | 0.641           | 0.00112 | 0.17      |
| $\text{Tm}^{\text{II}}\text{I}_2(\text{THF})_3$                   | 0.620           | 0.0024  | 0.39      |
| $\text{Tm}^{\text{III}}\text{I}_3(\text{THF})_{3.5}$              | 0.642           | 0.00147 | 0.23      |

**Table S2.** The DFT-PBE//TZP optimized ground-state geometrical coordinates (in Å) and DFT-XC//TZ2P (XC=PBE, BLYP, B3LYP, BHandHLYP) single-point calculated total bonding energies ( $E$ , in kcal/mol) of  $\text{Ln}(\text{C}_5\text{H}_4\text{SiMe}_3)_3^{x-}$  (Ln = Sm, Ho;  $x = 0, 1$ ).

| Sm(C <sub>5</sub> H <sub>4</sub> SiMe <sub>3</sub> ) <sub>3</sub> (4f <sup>5</sup> 5d <sup>0</sup> , sextet state) | Sm(C <sub>5</sub> H <sub>4</sub> SiMe <sub>3</sub> ) <sub>3</sub> <sup>-</sup> (4f <sup>6</sup> 5d <sup>0</sup> , septet state) |
|--------------------------------------------------------------------------------------------------------------------|---------------------------------------------------------------------------------------------------------------------------------|
| $E(\text{PBE})=-8935.82$ ; $E(\text{BLYP})=-8485.47$                                                               | $E(\text{PBE})=-8971.53$ ; $E(\text{BLYP})=-8520.87$                                                                            |
| $E(\text{B3LYP})=-10154.16$ ; $E(\text{BHandHLYP})=-12489.41$                                                      | $E(\text{B3LYP})=-10191.16$ ; $E(\text{BHandHLYP})=-12515.81$                                                                   |
| 1.Sm 0.588630 6.013376 3.465276                                                                                    | 1.Sm 0.491007 5.987784 3.468516                                                                                                 |
| 2.Si 2.095627 8.909309 0.888513                                                                                    | 2.Si 2.288933 8.802001 0.896949                                                                                                 |
| 3.Si -2.198432 9.156150 4.382272                                                                                   | 3.Si -2.260108 9.204081 4.383259                                                                                                |
| 4.Si 2.009055 2.651269 5.329473                                                                                    | 4.Si 2.272345 2.728553 5.296229                                                                                                 |
| 5.C 0.835056 6.222294 0.682105                                                                                     | 5.C 0.808983 6.266185 0.632215                                                                                                  |
| 6.H -0.038290 6.556995 0.126100                                                                                    | 6.H -0.043787 6.698079 0.110766                                                                                                 |
| 7.C 1.141731 4.873379 0.991244                                                                                     | 7.C 0.999507 4.889700 0.890383                                                                                                  |
| 8.H 0.552803 4.001555 0.708795                                                                                     | 8.H 0.332162 4.082491 0.588258                                                                                                  |
| 9.C 2.376805 4.859275 1.690104                                                                                     | 9.C 2.234146 4.743005 1.586753                                                                                                  |
| 10.H 2.905759 3.974881 2.041347                                                                                    | 10.H 2.682177 3.801881 1.903158                                                                                                 |
| 11.C 2.818989 6.200032 1.814616                                                                                    | 11.C 2.792366 6.030521 1.755992                                                                                                 |
| 12.H 3.750888 6.513957 2.281957                                                                                    | 12.H 3.742824 6.247410 2.242034                                                                                                 |
| 13.C 1.864635 7.068794 1.197908                                                                                    | 13.C 1.911830 7.003583 1.173603                                                                                                 |
| 14.C 3.727013 9.170631 -0.033349                                                                                   | 14.C 3.860034 8.985939 -0.165734                                                                                                |
| 15.H 3.723587 8.632314 -0.992553                                                                                   | 15.H 3.728549 8.483935 -1.136400                                                                                                |
| 16.H 4.578502 8.797330 0.555166                                                                                    | 16.H 4.722507 8.518193 0.333697                                                                                                 |
| 17.H 3.900593 10.238214 -0.238719                                                                                  | 17.H 4.105561 10.043935 -0.352042                                                                                               |
| 18.C 0.665975 9.559967 -0.163503                                                                                   | 18.C 0.863890 9.639681 -0.036443                                                                                                |
| 19.H -0.307524 9.425158 0.329929                                                                                   | 19.H -0.078286 9.578162 0.527064                                                                                                |
| 20.H 0.629402 9.042352 -1.133733                                                                                   | 20.H 0.706928 9.158738 -1.014050                                                                                                |
| 21.H 0.792284 10.635029 -0.362639                                                                                  | 21.H 1.083577 10.704271 -0.213064                                                                                               |
| 22.C 2.190192 9.862932 2.527612                                                                                    | 22.C 2.620106 9.749099 2.512678                                                                                                 |
| 23.H 1.265745 9.775097 3.118853                                                                                    | 23.H 1.738299 9.738820 3.171540                                                                                                 |
| 24.H 2.361979 10.935160 2.345295                                                                                   | 24.H 2.888493 10.799690 2.312809                                                                                                |
| 25.H 3.023292 9.495571 3.146193                                                                                    | 25.H 3.450202 9.286217 3.068743                                                                                                 |
| 26.C -1.928040 6.227477 4.696173                                                                                   | 26.C -2.108116 6.283096 4.681453                                                                                                |
| 27.H -1.958783 6.243498 5.784156                                                                                   | 27.H -2.111811 6.285639 5.770857                                                                                                |
| 28.C -1.977665 5.060884 3.894927                                                                                   | 28.C -2.188634 5.129683 3.867846                                                                                                |
| 29.H -2.050948 4.036288 4.258386                                                                                   | 29.H -2.276767 4.101144 4.220650                                                                                                |
| 30.C -1.956501 5.466686 2.535110                                                                                   | 30.C -2.158849 5.550244 2.507337                                                                                                |
| 31.H -2.006139 4.810604 1.668016                                                                                   | 31.H -2.204731 4.901111 1.633739                                                                                                |
| 32.C -1.888274 6.883425 2.508961                                                                                   | 32.C -2.049144 6.958781 2.492797                                                                                                |
| 33.H -1.891728 7.497079 1.609796                                                                                   | 33.H -2.013050 7.580223 1.598657                                                                                                |
| 34.C -1.864624 7.380175 3.850660                                                                                   | 34.C -2.009521 7.442303 3.845884                                                                                                |
| 35.C -3.972381 9.245775 5.038102                                                                                   | 35.C -4.105699 9.514367 4.751693                                                                                                |
| 36.H -4.689016 8.922077 4.268870                                                                                   | 36.H -4.715765 9.302065 3.860417                                                                                                |
| 37.H -4.231678 10.272652 5.339055                                                                                  | 37.H -4.293314 10.556007 5.059290                                                                                               |

|                                                                                                                                                                                                                                                                                                                                                                                                                                                                                                                                          |                                                                                                                                                                                                                                                                                                                                                                                                                                                                                                                                         |
|------------------------------------------------------------------------------------------------------------------------------------------------------------------------------------------------------------------------------------------------------------------------------------------------------------------------------------------------------------------------------------------------------------------------------------------------------------------------------------------------------------------------------------------|-----------------------------------------------------------------------------------------------------------------------------------------------------------------------------------------------------------------------------------------------------------------------------------------------------------------------------------------------------------------------------------------------------------------------------------------------------------------------------------------------------------------------------------------|
| 38.H -4.104800 8.591699 5.912913                                                                                                                                                                                                                                                                                                                                                                                                                                                                                                         | 38.H -4.455554 8.849895 5.556658                                                                                                                                                                                                                                                                                                                                                                                                                                                                                                        |
| 39.C -1.035326 9.741490 5.759407                                                                                                                                                                                                                                                                                                                                                                                                                                                                                                         | 39.C -1.309440 9.645718 5.967543                                                                                                                                                                                                                                                                                                                                                                                                                                                                                                        |
| 40.H 0.020115 9.734950 5.448974                                                                                                                                                                                                                                                                                                                                                                                                                                                                                                          | 40.H -0.222770 9.564389 5.817877                                                                                                                                                                                                                                                                                                                                                                                                                                                                                                        |
| 41.H -1.129940 9.113472 6.658147                                                                                                                                                                                                                                                                                                                                                                                                                                                                                                         | 41.H -1.584297 8.974998 6.796230                                                                                                                                                                                                                                                                                                                                                                                                                                                                                                        |
| 42.H -1.291005 10.772109 6.051024                                                                                                                                                                                                                                                                                                                                                                                                                                                                                                        | 42.H -1.539144 10.677081 6.280754                                                                                                                                                                                                                                                                                                                                                                                                                                                                                                       |
| 43.C -2.041910 10.317025 2.896505                                                                                                                                                                                                                                                                                                                                                                                                                                                                                                        | 43.C -1.758829 10.426409 3.019745                                                                                                                                                                                                                                                                                                                                                                                                                                                                                                       |
| 44.H -1.021646 10.341705 2.487632                                                                                                                                                                                                                                                                                                                                                                                                                                                                                                        | 44.H -0.683705 10.367375 2.796875                                                                                                                                                                                                                                                                                                                                                                                                                                                                                                       |
| 45.H -2.304095 11.343859 3.194073                                                                                                                                                                                                                                                                                                                                                                                                                                                                                                        | 45.H -1.985719 11.459910 3.326787                                                                                                                                                                                                                                                                                                                                                                                                                                                                                                       |
| 46.H -2.726357 10.022317 2.086909                                                                                                                                                                                                                                                                                                                                                                                                                                                                                                        | 46.H -2.308448 10.225909 2.087122                                                                                                                                                                                                                                                                                                                                                                                                                                                                                                       |
| 47.C 2.860338 5.478962 5.009670                                                                                                                                                                                                                                                                                                                                                                                                                                                                                                          | 47.C 2.808956 5.629720 5.148046                                                                                                                                                                                                                                                                                                                                                                                                                                                                                                         |
| 48.H 3.781489 5.241470 4.481891                                                                                                                                                                                                                                                                                                                                                                                                                                                                                                          | 48.H 3.757775 5.532842 4.623075                                                                                                                                                                                                                                                                                                                                                                                                                                                                                                         |
| 49.C 2.446011 6.777616 5.394485                                                                                                                                                                                                                                                                                                                                                                                                                                                                                                          | 49.C 2.239386 6.841002 5.600259                                                                                                                                                                                                                                                                                                                                                                                                                                                                                                         |
| 50.H 2.994107 7.703363 5.223004                                                                                                                                                                                                                                                                                                                                                                                                                                                                                                          | 50.H 2.676077 7.834450 5.495916                                                                                                                                                                                                                                                                                                                                                                                                                                                                                                         |
| 51.C 1.214800 6.651304 6.089974                                                                                                                                                                                                                                                                                                                                                                                                                                                                                                          | 51.C 1.005860 6.531421 6.241396                                                                                                                                                                                                                                                                                                                                                                                                                                                                                                         |
| 52.H 0.649053 7.462784 6.542544                                                                                                                                                                                                                                                                                                                                                                                                                                                                                                          | 52.H 0.329463 7.247439 6.704221                                                                                                                                                                                                                                                                                                                                                                                                                                                                                                         |
| 53.C 0.876405 5.275428 6.123186                                                                                                                                                                                                                                                                                                                                                                                                                                                                                                          | 53.C 0.818962 5.133592 6.173939                                                                                                                                                                                                                                                                                                                                                                                                                                                                                                         |
| 54.H -0.000362 4.854871 6.612606                                                                                                                                                                                                                                                                                                                                                                                                                                                                                                         | 54.H -0.030851 4.589898 6.587141                                                                                                                                                                                                                                                                                                                                                                                                                                                                                                        |
| 55.C 1.886116 4.525527 5.441913                                                                                                                                                                                                                                                                                                                                                                                                                                                                                                          | 55.C 1.933511 4.545714 5.482696                                                                                                                                                                                                                                                                                                                                                                                                                                                                                                         |
| 56.C 3.778210 2.169981 4.865650                                                                                                                                                                                                                                                                                                                                                                                                                                                                                                          | 56.C 3.988061 2.440310 4.533910                                                                                                                                                                                                                                                                                                                                                                                                                                                                                                         |
| 57.H 3.879623 1.074928 4.821191                                                                                                                                                                                                                                                                                                                                                                                                                                                                                                          | 57.H 4.184247 1.363847 4.408612                                                                                                                                                                                                                                                                                                                                                                                                                                                                                                         |
| 58.H 4.497437 2.546864 5.607701                                                                                                                                                                                                                                                                                                                                                                                                                                                                                                          | 58.H 4.774349 2.856267 5.182106                                                                                                                                                                                                                                                                                                                                                                                                                                                                                                         |
| 59.H 4.068195 2.569232 3.882093                                                                                                                                                                                                                                                                                                                                                                                                                                                                                                          | 59.H 4.079096 2.918827 3.547921                                                                                                                                                                                                                                                                                                                                                                                                                                                                                                         |
| 60.C 1.555276 1.902539 7.006064                                                                                                                                                                                                                                                                                                                                                                                                                                                                                                          | 60.C 2.244568 1.866862 6.994470                                                                                                                                                                                                                                                                                                                                                                                                                                                                                                         |
| 61.H 0.522159 2.154902 7.288926                                                                                                                                                                                                                                                                                                                                                                                                                                                                                                          | 61.H 1.266426 1.998139 7.482292                                                                                                                                                                                                                                                                                                                                                                                                                                                                                                         |
| 62.H 2.220418 2.277507 7.797603                                                                                                                                                                                                                                                                                                                                                                                                                                                                                                          | 62.H 3.006355 2.300648 7.659928                                                                                                                                                                                                                                                                                                                                                                                                                                                                                                         |
| 63.H 1.636236 0.804964 6.980203                                                                                                                                                                                                                                                                                                                                                                                                                                                                                                          | 63.H 2.437732 0.785730 6.903096                                                                                                                                                                                                                                                                                                                                                                                                                                                                                                         |
| 64.C 0.817767 1.943234 4.029830                                                                                                                                                                                                                                                                                                                                                                                                                                                                                                          | 64.C 0.968336 1.846434 4.224962                                                                                                                                                                                                                                                                                                                                                                                                                                                                                                         |
| 65.H -0.229235 2.184983 4.268612                                                                                                                                                                                                                                                                                                                                                                                                                                                                                                         | 65.H -0.040914 1.997756 4.639101                                                                                                                                                                                                                                                                                                                                                                                                                                                                                                        |
| 66.H 0.900947 0.845694 3.992783                                                                                                                                                                                                                                                                                                                                                                                                                                                                                                          | 66.H 1.154020 0.760933 4.178853                                                                                                                                                                                                                                                                                                                                                                                                                                                                                                         |
| 67.H 1.033944 2.323218 3.019520                                                                                                                                                                                                                                                                                                                                                                                                                                                                                                          | 67.H 0.967757 2.235875 3.195281                                                                                                                                                                                                                                                                                                                                                                                                                                                                                                         |
| Ho(C <sub>5</sub> H <sub>4</sub> SiMe <sub>3</sub> ) <sub>3</sub> (4f <sup>10</sup> 5d <sup>0</sup> , quintet state)<br><i>E</i> (PBE)=-8854.32; <i>E</i> (BLYP)=-8406.99<br><i>E</i> (B3LYP)=-10049.08; <i>E</i> (BHandHLYP)=-12349.56                                                                                                                                                                                                                                                                                                  | Ho(C <sub>5</sub> H <sub>4</sub> SiMe <sub>3</sub> ) <sub>3</sub> <sup>-</sup> (4f <sup>10</sup> 5d <sup>1</sup> , sextet state)<br><i>E</i> (PBE)=-8868.29; <i>E</i> (BLYP)=-8417.36<br><i>E</i> (B3LYP)=-10063.06; <i>E</i> (BHandHLYP)=-12359.95                                                                                                                                                                                                                                                                                     |
| 1.Ho 0.587092 6.052398 3.479993<br>2.Si 2.066086 8.874173 0.892095<br>3.Si -2.163198 9.153958 4.366358<br>4.Si 2.020467 2.645229 5.278073<br>5.C 0.793492 6.185649 0.751886<br>6.H -0.078669 6.507602 0.187625<br>7.C 1.097480 4.845736 1.095859<br>8.H 0.510842 3.966948 0.832471<br>9.C 2.333880 4.847452 1.794800<br>10.H 2.860656 3.970973 2.166399<br>11.C 2.776041 6.189040 1.888816<br>12.H 3.706731 6.515331 2.349035<br>13.C 1.818513 7.045259 1.256252<br>14.C 3.696574 9.087403 -0.043546<br>15.H 3.682299 8.521933 -0.986870 | 1.Ho 0.621110 6.020346 3.421939<br>2.Si 2.158731 9.024863 1.014691<br>3.Si -2.240234 8.991296 4.320680<br>4.Si 1.820920 2.661707 5.468456<br>5.C 0.937327 6.352483 0.715244<br>6.H 0.059593 6.694985 0.171639<br>7.C 1.280308 4.999452 0.948372<br>8.H 0.717094 4.125742 0.624398<br>9.C 2.502152 4.980133 1.672077<br>10.H 3.027961 4.089793 2.010396<br>11.C 2.903853 6.317426 1.885652<br>12.H 3.802992 6.627402 2.416345<br>13.C 1.928852 7.204859 1.317705<br>14.C 3.703265 9.293156 -0.073428<br>15.H 3.602863 8.750502 -1.025974 |



|      |           |           |           |      |           |           |           |
|------|-----------|-----------|-----------|------|-----------|-----------|-----------|
| 16.H | 4.545500  | 8.719995  | 0.552324  | 16.H | 4.604324  | 8.911069  | 0.430867  |
| 17.H | 3.883283  | 10.146325 | -0.279973 | 17.H | 3.865322  | 10.360007 | -0.297400 |
| 18.C | 0.639756  | 9.507725  | -0.174025 | 18.C | 0.676609  | 9.717454  | 0.051156  |
| 19.H | -0.333982 | 9.393071  | 0.323786  | 19.H | -0.266316 | 9.579345  | 0.598204  |
| 20.H | 0.598416  | 8.965095  | -1.130279 | 20.H | 0.583677  | 9.208715  | -0.920901 |
| 21.H | 0.773737  | 10.576254 | -0.401271 | 21.H | 0.802682  | 10.794521 | -0.140929 |
| 22.C | 2.180631  | 9.872643  | 2.502725  | 22.C | 2.442679  | 10.043019 | 2.592413  |
| 23.H | 1.260258  | 9.807631  | 3.102897  | 23.H | 1.583199  | 9.960376  | 3.273686  |
| 24.H | 2.360202  | 10.938034 | 2.290400  | 24.H | 2.612616  | 11.106759 | 2.355576  |
| 25.H | 3.015422  | 9.514949  | 3.124820  | 25.H | 3.326504  | 9.671152  | 3.134131  |
| 26.C | -1.861348 | 6.235932  | 4.714409  | 26.C | -1.880652 | 6.087230  | 4.568860  |
| 27.H | -1.888254 | 6.268245  | 5.801573  | 27.H | -1.922207 | 6.077596  | 5.655931  |
| 28.C | -1.894842 | 5.057046  | 3.930883  | 28.C | -1.878609 | 4.938696  | 3.736327  |
| 29.H | -1.958322 | 4.037287  | 4.308462  | 29.H | -1.915692 | 3.902812  | 4.067676  |
| 30.C | -1.887539 | 5.444435  | 2.564250  | 30.C | -1.865667 | 5.386836  | 2.388170  |
| 31.H | -1.934341 | 4.774851  | 1.708056  | 31.H | -1.844022 | 4.749637  | 1.505453  |
| 32.C | -1.833754 | 6.859494  | 2.517162  | 32.C | -1.839555 | 6.798730  | 2.394545  |
| 33.H | -1.845660 | 7.461371  | 1.610638  | 33.H | -1.818093 | 7.433694  | 1.510399  |
| 34.C | -1.805362 | 7.376445  | 3.853383  | 34.C | -1.828207 | 7.268669  | 3.752030  |
| 35.C | -3.936969 | 9.223156  | 5.024438  | 35.C | -4.094814 | 9.068340  | 4.766125  |
| 36.H | -4.650213 | 8.883273  | 4.259004  | 36.H | -4.711390 | 8.800082  | 3.894375  |
| 37.H | -4.210524 | 10.248569 | 5.317668  | 37.H | -4.393380 | 10.073829 | 5.104483  |
| 38.H | -4.058627 | 8.574207  | 5.904585  | 38.H | -4.330402 | 8.352403  | 5.568782  |
| 39.C | -1.006106 | 9.768759  | 5.735672  | 39.C | -1.295936 | 9.539550  | 5.873847  |
| 40.H | 0.050422  | 9.760458  | 5.429046  | 40.H | -0.218838 | 9.622976  | 5.668392  |
| 41.H | -1.101150 | 9.157687  | 6.645982  | 41.H | -1.429169 | 8.821755  | 6.697796  |
| 42.H | -1.266654 | 10.803544 | 6.007556  | 42.H | -1.662466 | 10.520186 | 6.218834  |
| 43.C | -2.028107 | 10.303118 | 2.869650  | 43.C | -1.951970 | 10.282107 | 2.960935  |
| 44.H | -1.008515 | 10.345034 | 2.460955  | 44.H | -0.885763 | 10.374602 | 2.712101  |
| 45.H | -2.311322 | 11.327032 | 3.157913  | 45.H | -2.311289 | 11.268682 | 3.294712  |
| 46.H | -2.706230 | 9.987246  | 2.062701  | 46.H | -2.496510 | 10.021541 | 2.040387  |
| 47.C | 2.821327  | 5.490930  | 4.977881  | 47.C | 2.805247  | 5.401232  | 4.948568  |
| 48.H | 3.751449  | 5.273945  | 4.458242  | 48.H | 3.695131  | 5.099103  | 4.400319  |
| 49.C | 2.385461  | 6.776825  | 5.377174  | 49.C | 2.480453  | 6.729428  | 5.314182  |
| 50.H | 2.924408  | 7.712457  | 5.231698  | 50.H | 3.065556  | 7.620813  | 5.093036  |
| 51.C | 1.147511  | 6.621266  | 6.059876  | 51.C | 1.248900  | 6.698372  | 6.020623  |
| 52.H | 0.567056  | 7.417995  | 6.519433  | 52.H | 0.728345  | 7.559701  | 6.432556  |
| 53.C | 0.827287  | 5.242527  | 6.062933  | 53.C | 0.818092  | 5.353628  | 6.082430  |
| 54.H | -0.048244 | 4.800538  | 6.534164  | 54.H | -0.090977 | 5.003420  | 6.566637  |
| 55.C | 1.850851  | 4.517987  | 5.373710  | 55.C | 1.759924  | 4.517378  | 5.388461  |
| 56.C | 3.802487  | 2.206371  | 4.818593  | 56.C | 2.696196  | 1.880333  | 3.976026  |
| 57.H | 3.933087  | 1.113800  | 4.791774  | 57.H | 2.796846  | 0.791816  | 4.116101  |
| 58.H | 4.510823  | 2.613573  | 5.555243  | 58.H | 3.707271  | 2.295742  | 3.844086  |
| 59.H | 4.084101  | 2.596738  | 3.829144  | 59.H | 2.130242  | 2.062636  | 3.051169  |
| 60.C | 1.602060  | 1.912687  | 6.971568  | 60.C | 2.801364  | 2.117768  | 7.013998  |
| 61.H | 0.563196  | 2.136917  | 7.257197  | 61.H | 2.331053  | 2.512109  | 7.928058  |
| 62.H | 2.259757  | 2.323142  | 7.751693  | 62.H | 3.829325  | 2.510714  | 6.976408  |
| 63.H | 1.718046  | 0.817955  | 6.964892  | 63.H | 2.856132  | 1.020409  | 7.100618  |
| 64.C | 0.843975  | 1.877084  | 4.002111  | 64.C | 0.086608  | 1.905272  | 5.626786  |
| 65.H | -0.207319 | 2.097676  | 4.241767  | 65.H | -0.464683 | 2.345068  | 6.472028  |

|                                                                                                                                                                                                                                                                                                                                                                                                                                                                                                                                                                                                                                                                                                                                                                                                                                                                                                                                                                                                                                                                                                                                                                                                                                                                                                                                                                                                                                                                                                                                                                                           |                                                                     |
|-------------------------------------------------------------------------------------------------------------------------------------------------------------------------------------------------------------------------------------------------------------------------------------------------------------------------------------------------------------------------------------------------------------------------------------------------------------------------------------------------------------------------------------------------------------------------------------------------------------------------------------------------------------------------------------------------------------------------------------------------------------------------------------------------------------------------------------------------------------------------------------------------------------------------------------------------------------------------------------------------------------------------------------------------------------------------------------------------------------------------------------------------------------------------------------------------------------------------------------------------------------------------------------------------------------------------------------------------------------------------------------------------------------------------------------------------------------------------------------------------------------------------------------------------------------------------------------------|---------------------------------------------------------------------|
| 66.H 0.957283 0.781743 3.990408<br>67.H 1.043419 2.243436 2.984082                                                                                                                                                                                                                                                                                                                                                                                                                                                                                                                                                                                                                                                                                                                                                                                                                                                                                                                                                                                                                                                                                                                                                                                                                                                                                                                                                                                                                                                                                                                        | 66.H 0.152341 0.818521 5.796231<br>67.H -0.499126 2.079889 4.712851 |
| Ho(C <sub>5</sub> H <sub>4</sub> SiMe <sub>3</sub> ) <sub>3</sub> <sup>-</sup> (4f <sup>11</sup> 5d <sup>0</sup> , quartet state)<br><i>E</i> (PBE)=-8883.41; <i>E</i> (BLYP)=-8436.21<br><i>E</i> (B3LYP)=-10064.88; <i>E</i> (BHandHLYP)=12332.83                                                                                                                                                                                                                                                                                                                                                                                                                                                                                                                                                                                                                                                                                                                                                                                                                                                                                                                                                                                                                                                                                                                                                                                                                                                                                                                                       |                                                                     |
| 1.Ho 0.560913 6.029876 3.471738<br>2.Si 2.191469 8.840747 0.902511<br>3.Si -2.257497 9.114345 4.405883<br>4.Si 2.070488 2.718803 5.290380<br>5.C 0.823075 6.232947 0.668127<br>6.H -0.046906 6.612968 0.135765<br>7.C 1.080538 4.874384 0.953740<br>8.H 0.453408 4.029228 0.670398<br>9.C 2.317437 4.800183 1.656290<br>10.H 2.803469 3.888916 2.002153<br>11.C 2.810691 6.114720 1.808013<br>12.H 3.746738 6.387445 2.292835<br>13.C 1.882169 7.033598 1.212541<br>14.C 3.748238 9.059939 -0.172515<br>15.H 3.627284 8.539870 -1.135070<br>16.H 4.627944 8.627491 0.328478<br>17.H 3.958065 10.122526 -0.375362<br>18.C 0.731583 9.611530 -0.033350<br>19.H -0.201901 9.538148 0.542926<br>20.H 0.577781 9.100074 -0.995971<br>21.H 0.918117 10.676908 -0.240639<br>22.C 2.498401 9.815880 2.505920<br>23.H 1.629865 9.765240 3.180887<br>24.H 2.708187 10.877392 2.295358<br>25.H 3.361241 9.401684 3.050372<br>26.C -1.962532 6.212974 4.716675<br>27.H -1.973009 6.224732 5.805444<br>28.C -1.999469 5.052231 3.910342<br>29.H -2.053917 4.023658 4.268208<br>30.C -1.980477 5.463820 2.547301<br>31.H -2.001872 4.807199 1.678834<br>32.C -1.915790 6.875475 2.523070<br>33.H -1.900590 7.491775 1.624973<br>34.C -1.894108 7.370974 3.874034<br>35.C -4.123038 9.301047 4.758528<br>36.H -4.710137 9.050685 3.861581<br>37.H -4.382486 10.326872 5.066777<br>38.H -4.434456 8.612237 5.558917<br>39.C -1.355343 9.621726 5.998900<br>40.H -0.265936 9.646870 5.849761<br>41.H -1.565975 8.915472 6.816887<br>42.H -1.683035 10.622125 6.325466<br>43.C -1.831734 10.369344 3.045828 |                                                                     |

|      |           |           |          |
|------|-----------|-----------|----------|
| 44.H | -0.754414 | 10.385093 | 2.826812 |
| 45.H | -2.129683 | 11.384234 | 3.354342 |
| 46.H | -2.363647 | 10.134392 | 2.110848 |
| 47.C | 2.865265  | 5.547056  | 5.029899 |
| 48.H | 3.790138  | 5.340963  | 4.494925 |
| 49.C | 2.416916  | 6.822231  | 5.434225 |
| 50.H | 2.940302  | 7.765797  | 5.277337 |
| 51.C | 1.170098  | 6.661346  | 6.104695 |
| 52.H | 0.577656  | 7.454757  | 6.555297 |
| 53.C | 0.852050  | 5.283773  | 6.097361 |
| 54.H | -0.031508 | 4.836673  | 6.550706 |
| 55.C | 1.892221  | 4.564118  | 5.412065 |
| 56.C | 3.818590  | 2.264969  | 4.698357 |
| 57.H | 3.941192  | 1.171593  | 4.647554 |
| 58.H | 4.578511  | 2.663404  | 5.387592 |
| 59.H | 4.026036  | 2.673928  | 3.698288 |
| 60.C | 1.809060  | 1.920527  | 6.999863 |
| 61.H | 0.802986  | 2.147794  | 7.385199 |
| 62.H | 2.537366  | 2.311993  | 7.726173 |
| 63.H | 1.915589  | 0.824620  | 6.955566 |
| 64.C | 0.818301  | 1.891283  | 4.119718 |
| 65.H | -0.214377 | 2.107133  | 4.434433 |
| 66.H | 0.948330  | 0.795986  | 4.112408 |
| 67.H | 0.932791  | 2.257829  | 3.088561 |

**Table S3.** Relative single-point energy difference in kcal/mol between  $f^{10}d^1$  and  $f^{11}d^0$  in  $\text{Ho}^{\text{II}}(\text{C}_5\text{H}_4\text{SiMe}_3)_3^{-}$  from different functional results at the PBE//TZP optimized ground-state geometries.

| Compound    | $\Delta E(\text{PBE})$ | $\Delta E(\text{B3LYP})$ | $\Delta E(\text{BHandHLYP})$ |
|-------------|------------------------|--------------------------|------------------------------|
| $f^{10}d^1$ | 0                      | 0                        | 0                            |
| $f^{11}d^0$ | -15.1                  | -1.8                     | 27.1                         |
